# Supplementary material
Source: PubMed Central journal article supplement (PMC6276043)
Supplement: oc8b00565_si_001.pdf [file oc8b00565_si_001.pdf]

Supplementary Information for

**Photo-induced ligand release from a silicon phthalocyanine dye conjugated with monoclonal antibodies; A mechanism of cancer cell cytotoxicity after near infrared photoimmunotherapy**

Kazuhide Sato,<sup>†,‡,§</sup> Kanta Ando,<sup>¶</sup> Shuhei Okuyama,<sup>†,⊥</sup> Shiho Moriguchi,<sup>⊥</sup> Tairo Ogura,<sup>⊥</sup> Shinichiro Totoki,<sup>⊥</sup> Hirofumi Hanaoka,<sup>†</sup> Tadanobu Nagaya,<sup>†</sup> Ryohei Kokawa,<sup>⊥</sup> Hideo Takakura,<sup>¶</sup> Masayuki Nishimura,<sup>⊥</sup> Yoshinori Hasegawa,<sup>§</sup> Peter L. Choyke,<sup>†</sup> Mikako Ogawa,<sup>¶</sup> and Hisataka Kobayashi<sup>†,†</sup>

<sup>†</sup>Molecular Imaging Program, Center for Cancer Research, National Cancer Institute, National Institutes of Health, Bethesda, Maryland, 20892-1002, USA.

<sup>‡</sup> Institute for Advanced Research, Nagoya University, Nagoya, Aichi, 464-0814, Japan

<sup>§</sup> Department of Respiratory Medicine, Nagoya University Graduate School of Medicine, Nagoya, Aichi, 466-8550, Japan

<sup>¶</sup>Laboratory for Bioanalysis and Molecular Imaging, Graduate School of Pharmaceutical Sciences, Hokkaido University, Sapporo, Hokkaido, 060-0812, Japan.

<sup>⊥</sup> Shimadzu Corporation, Kyoto, 604-8511, Japan

Correspondence should be addressed to: Hisataka Kobayashi, M.D., Ph.D.  
Molecular Imaging Program, Center for Cancer Research, National Cancer Institute,  
NIH, Building 10, Room B3B69, MSC1088, Bethesda, MD 20892-1088.  
Phone: 240-858-3069; Fax: 240-541-4527; E-mail: kobayash@mail.nih.gov

# Supplementary Figure 1

a

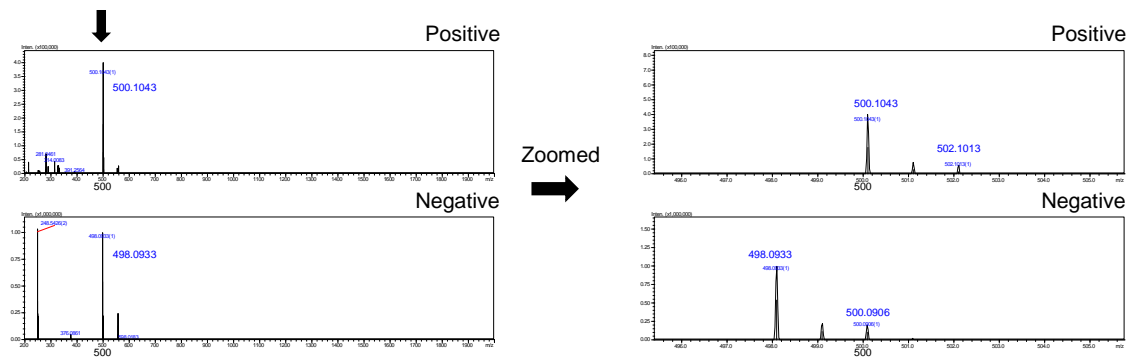

b

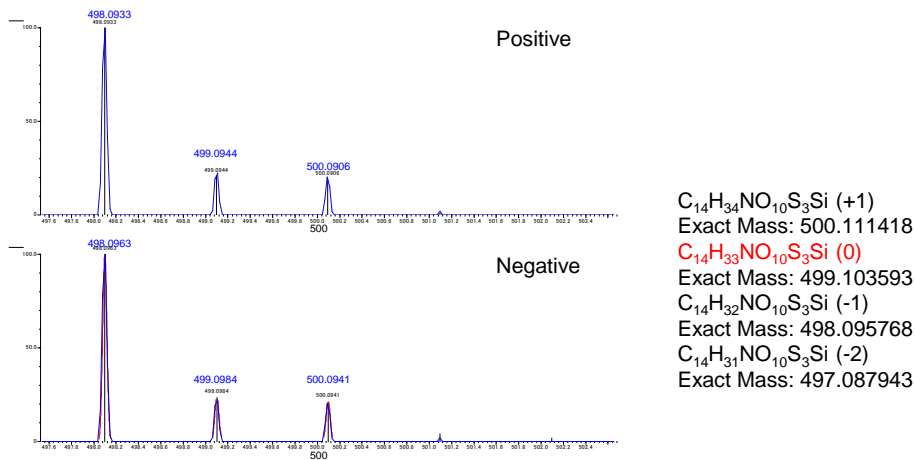

**Figure. S1. Ligand release from IR700-dye with NIR-light irradiation was further analyzed to detect isotope peak.**

(a) Analysis of isotope peak. (b) Structure prediction on Molecular weight was performed and  $C_{14}H_{34}NO_{10}S_3Si$  was predicted as released ligand.

# Supplementary Figure2

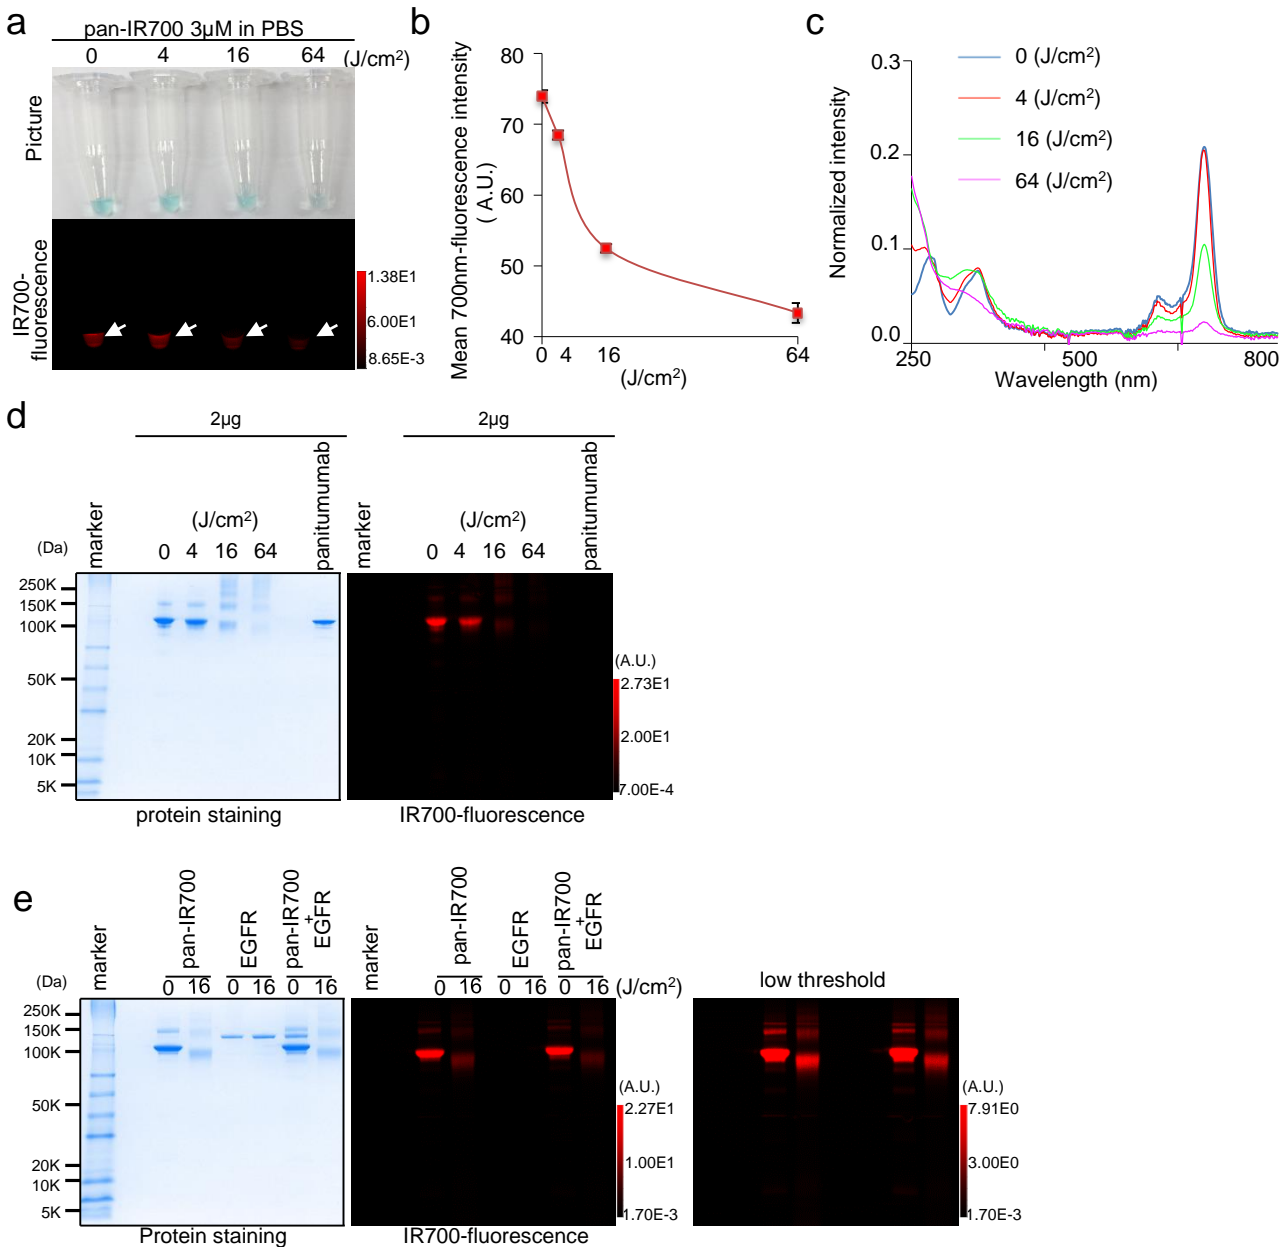

**Figure. S2. The releasing ligand of pan-IR700 with NIR-light induced panitumumab into hydrophobic to make aggregations, which also make aggregation to their antigen, EGFR protein.**

(a) 3 mM pan-IR700 in PBS was irradiated with NIR-light, and imaged with white light and 700 nm-fluorescence. Both the blue color in the tube and the 700 nm-fluorescence decreased in a light dose dependent manner. (b) Mean 700 nm-fluorescence intensity of pan-IR700 in PBS was decreased in a dose dependent manner ( $n = 3$ ). (c) Absorbance profile of pan-IR700 in PBS with NIR-light irradiation showed decrease of the absorbance at Q band at 690 nm of the SiPcs. (d) SDS-PAGE of NIR-light irradiated pan-IR700 revealed the protein-band of panitumumab disappeared in a dose-dependent manner, and some bands over panitumumab increased with smear. The IR700-fluorescence in the SDS-PAGE decreased in a light-dose dependent manner. (e) The complex of pan-IR700 and recombinant EGFR protein was irradiated with NIR-light and electrophoresed by SDS-PAGE. The protein bands of not only pan-IR700 but also EGFR become thin with smear over its protein band along with loss of IR700-fluorescence.

# Supplementary Figure3

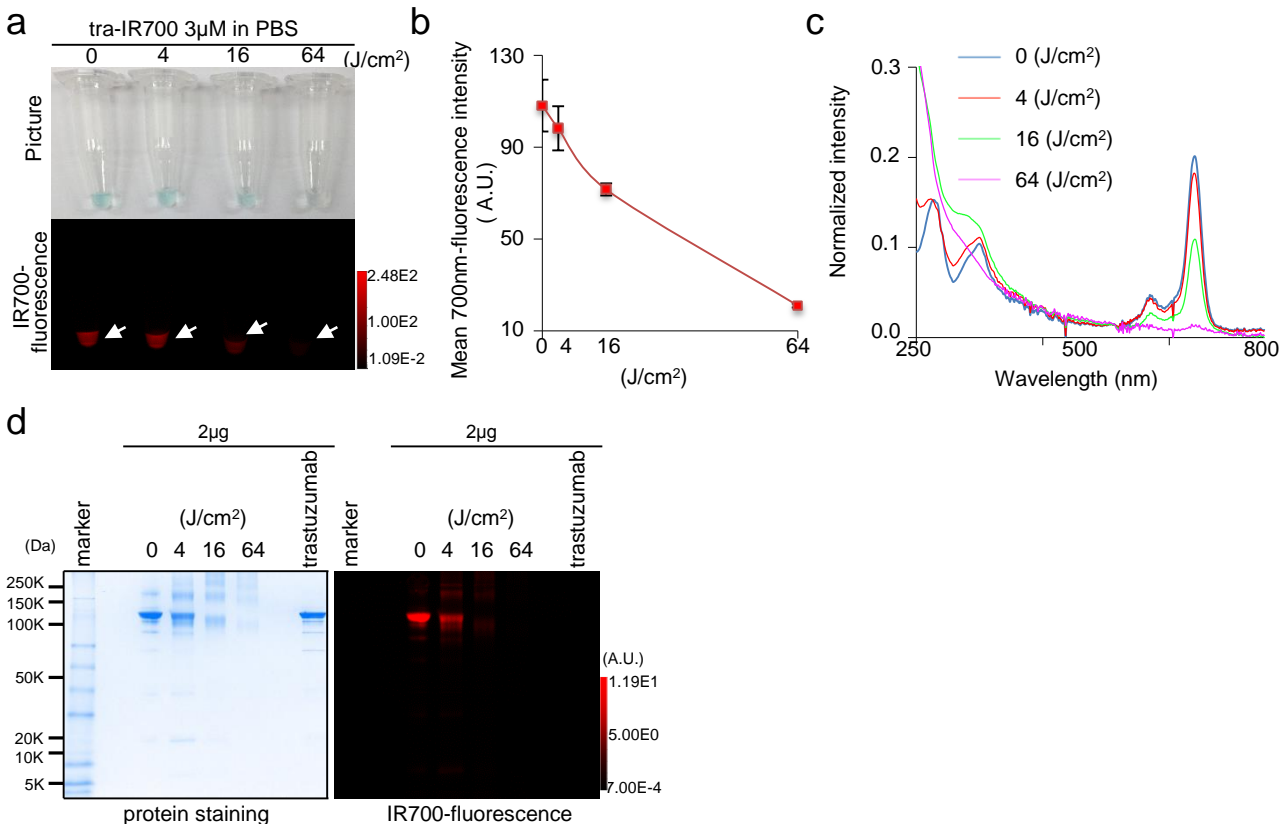

**Figure. S3. Tra-IR700 with NIR-light irradiation also made aggregation with loss of IR700-fluorescence.**

(a) 3 mM tra-IR700 in PBS was irradiated with NIR-light, and imaged with white light and 700 nm-fluorescence. Both the blue color in the tube and the 700 nm-fluorescence decreased in a light dose dependent manner. (b) Mean 700 nm-fluorescence intensity of tra-IR700 in PBS was decreased in a dose dependent manner ( $n = 3$ ). (c) Absorbance profile of tra-IR700 in PBS with NIR-light irradiation showed decrease of the absorbance at Q band at 690 nm of the silicon phthalocyanines (SiPcs). (d) SDS-PAGE of NIR-light irradiated tra-IR700 revealed the protein-band of trastuzumab disappeared in a dose-dependent manner, and some bands over trastuzumab increased with smear. The IR700-fluorescence in the SDS-PAGE decreased in a light-dose dependent manner.

# Supplementary Figure4

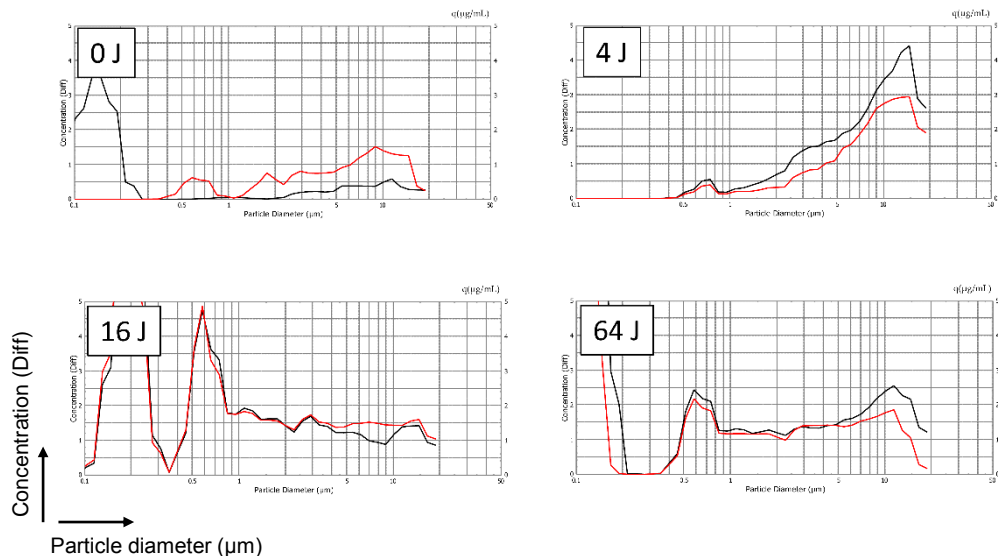

**Figure. S4. Distribution of the particles of aggregated cet-IR700.**

Distribution of the particles of aggregated cet-IR700 was showed as a graph. Total particles in 64 J/cm<sup>2</sup> decreased, suggesting the particles become hydrophobic.

# Supplementary Figure 5

a

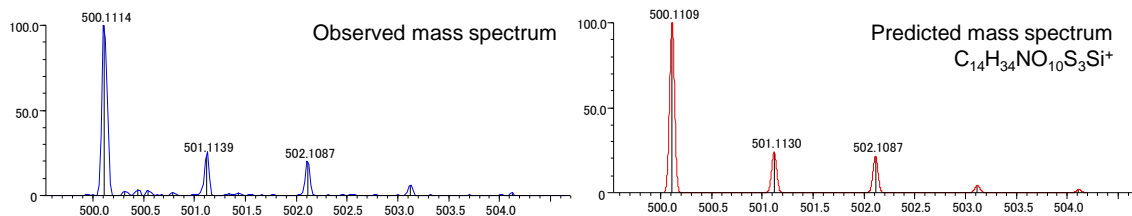

b

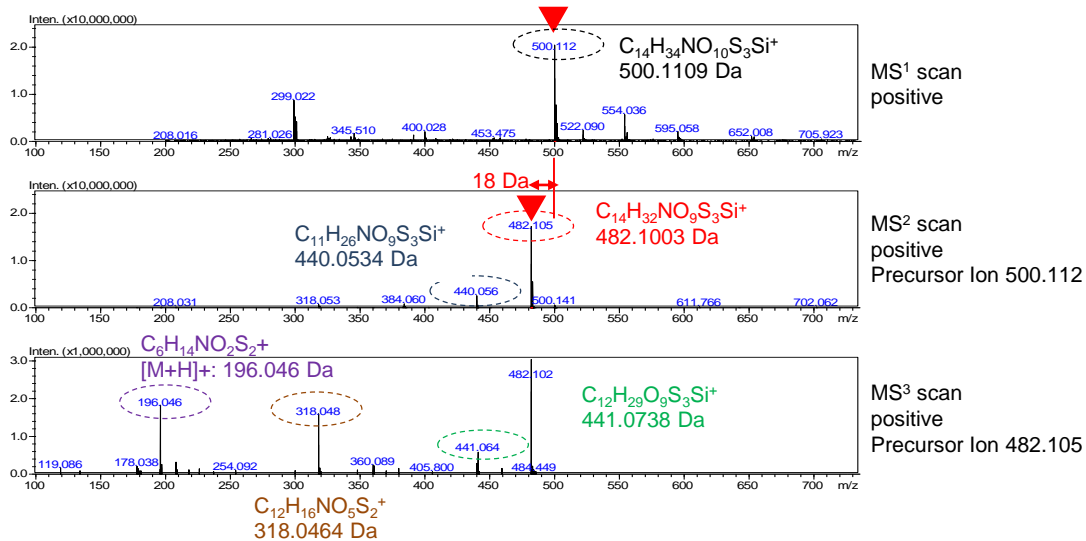

c

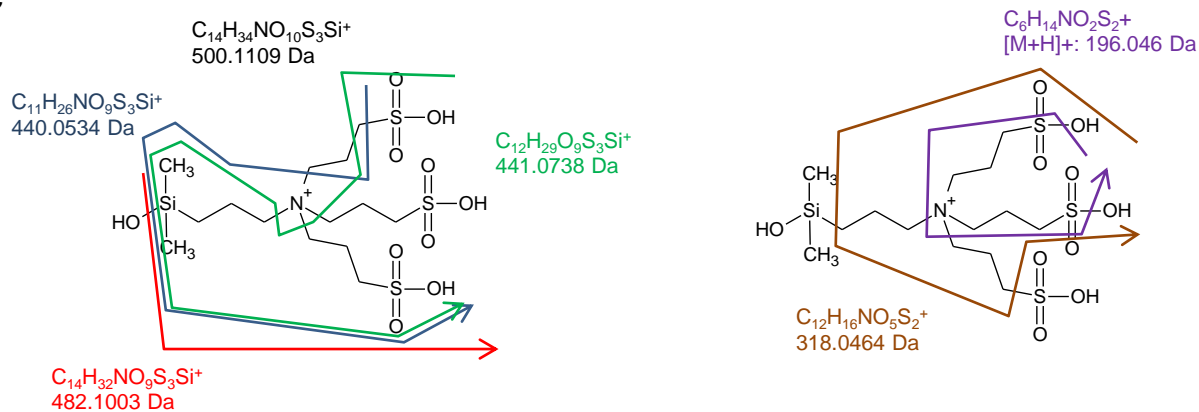

**Figure. S5. Ligand release from cet-IR700 with NIR-light irradiation was further confirmed with product-scan and fragmentation by IT-TOF-MS.**

(a) Result of product-scan method in IT-TOF MS. (b) Mass spectra of the released ligand from cet-IR700 after further fragmentation confirmed the detected peak as  $C_{14}H_{34}NO_{10}S_3Si$ . (c) Suggested fragmentation of the ligand detected in the mass spectra (panel b).



# Supplementary Figure6

a

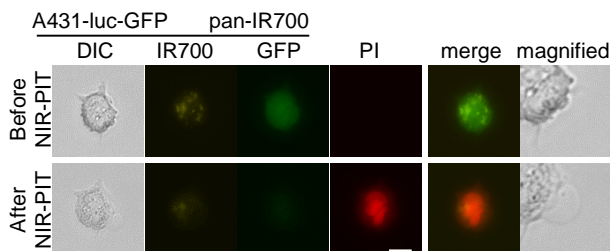

b

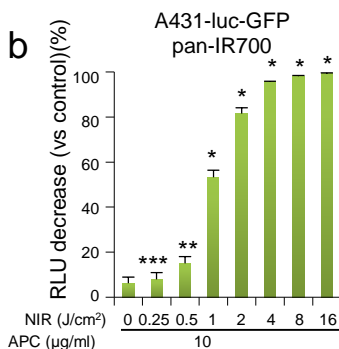

c

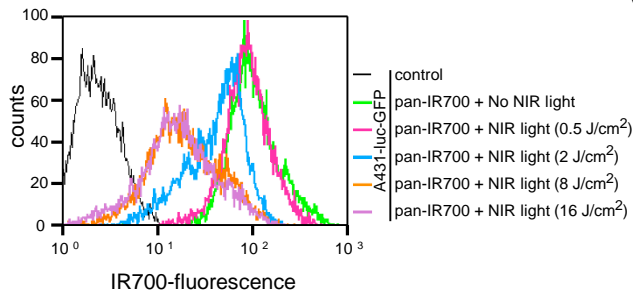

d

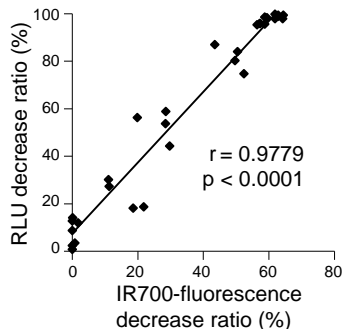

**Figure. S6. NIR-PIT cell death in vitro was detected as the loss of IR700-fluorescence (A431-luc-GFP with pan-IR700)**

(a) A431-luc-GFP cells were incubated with pan-IR700 for 6 hr, and observed with a microscope before and after irradiation of NIR-light (2 J/cm<sup>2</sup>). Necrotic cell death with loss of IR700-fluorescence was observed after exposure to NIR-light (1 hr after NIR-PIT). Bar = 50 µm. (b) Luciferase activity in A431-luc-GFP cells was measured as percentage decrease in relative light units (RLU) vs untreated cells, which decreased in a NIR-light dose-dependent manner. (n = 4, \*p < 0.0001, \*\*p < 0.001, \*\*\*p < 0.01, vs. untreated control, Student's t test) (c) IR700-fluorescence of a cell treated with NIR-PIT, was evaluated with a flow cytometry and shows decreased fluorescence in a NIR-light dose-dependent manner. (d) Positive correlation between RLU decrease ratio and IR700-fluorescence decrease ratio (n = 30, r = 0.9779, p < 0.0001, Pearson's product moment correlation coefficient).

# Supplementary Figure 7

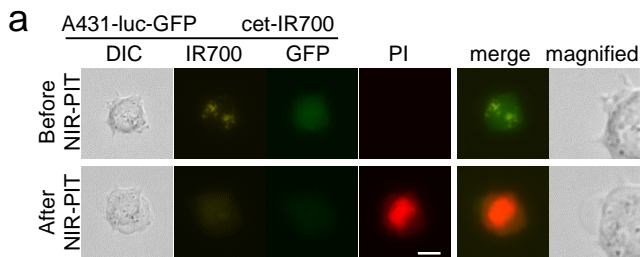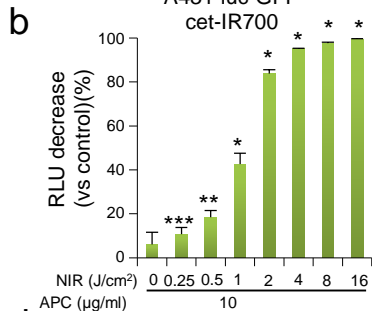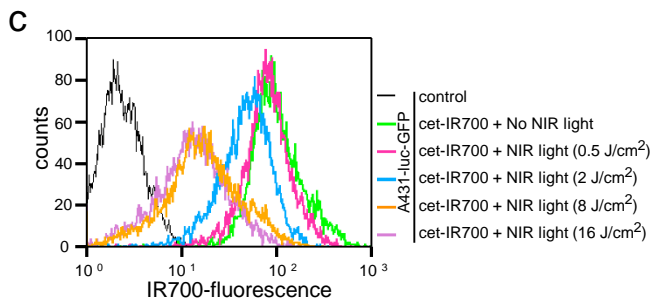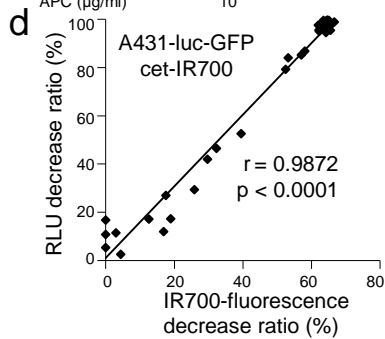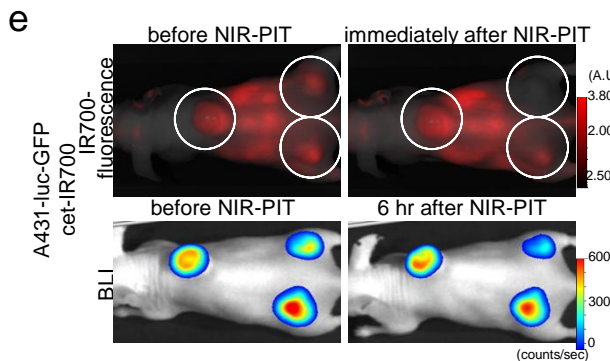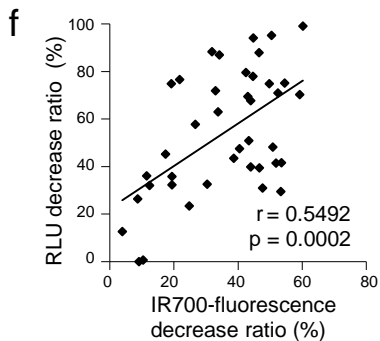

**Figure. S7. Correlation between loss of IR700-fluorescence and antitumor effect in vitro and in vivo (A431-luc-GFP with cet-IR700)**

(a) A431-luc-GFP cells were incubated with cet-IR700 for 6 hr, and observed with a microscope before and after irradiation of NIR-light ( $2 \text{ J/cm}^2$ ). Necrotic cell death with loss of IR700-fluorescence on the cell was observed after exposure to NIR-light (1 hr after NIR-PIT). Bar =  $50 \mu\text{m}$ . (b) Luciferase activity in A431-luc-GFP cells was measured as percentage decrease on relative light unit (RLU) vs untreated cells, which decreased in a NIR-light dose-dependent manner. ( $n = 4$ ,  $*p < 0.0001$ ,  $**p < 0.001$ ,  $***p < 0.01$ , vs. untreated control, Student's t test) (c) IR700-fluorescence on the cell treated with NIR-PIT, was evaluated with a flowcytometry and decreased in a NIR-light dose-dependent manner. (d) Positive correlation was detected between RLU decrease ratio and IR700-fluorescence decrease ratio ( $n = 30$ ,  $r = 0.9872$ ,  $p < 0.0001$ , Pearson's product moment correlation coefficient). (e) *In vivo* BLI and IR700-fluorescence imaging of subcutaneous tumor model before and at 6 hr after the NIR-light irradiation. (f) Positive correlation was detected between RLU decrease ratio and IR700-fluorescence decrease ratio ( $n = 40$ ,  $r = 0.5492$ ,  $p = 0.0002$ , Pearson's product moment correlation coefficient).

# Supplementary Figure 8

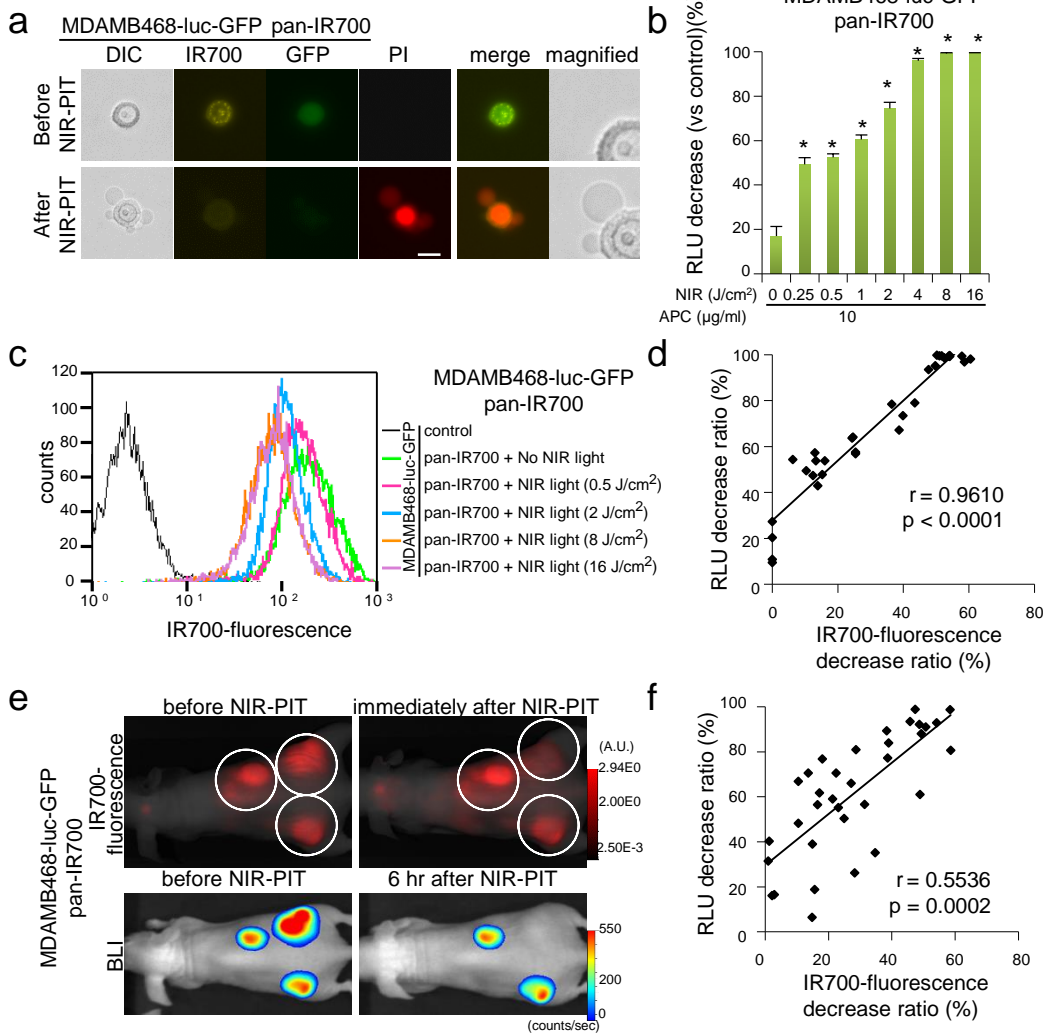

**Figure. S8. Correlation between loss of IR700-fluorescence and antitumor effect in vitro and in vivo (MDAMB468-luc-GFP with pan-IR700)**

(a) MDAMB468-luc-GFP cells were incubated with pan-IR700 for 6 hr, and observed with a microscope before and after irradiation of NIR-light ( $2 \text{ J/cm}^2$ ). Necrotic cell death with loss of IR700-fluorescence was observed after exposure to NIR-light (1 hr after NIR-PIT). Bar =  $50 \mu\text{m}$ . (b) Luciferase activity in MDAMB468-luc-GFP cells was measured as percentage decrease of relative light units (RLU) vs untreated cells, which decreased in a NIR-light dose-dependent manner. ( $n = 4$ ,  $*p < 0.0001$ ,  $**p < 0.001$ ,  $***p < 0.01$ , vs. untreated control, Student's t test) (c) IR700-fluorescence in a cell treated with NIR-PIT, was evaluated with a flow cytometry and decreased in a NIR-light dose-dependent manner. (d) Positive correlation was detected between RLU decrease ratio and IR700-fluorescence decrease ratio ( $n = 30$ ,  $r = 0.9610$ ,  $p < 0.0001$ , Pearson's product moment correlation coefficient). (e) *In vivo* BLI and IR700-fluorescence imaging of subcutaneous tumor model before and at 6 hr after the NIR-light irradiation. (f) Positive correlation was detected between RLU decrease ratio and IR700-fluorescence decrease ratio ( $n = 40$ ,  $r = 0.5536$ ,  $p = 0.0002$ , Pearson's product moment correlation coefficient).

# Supplementary Figure9

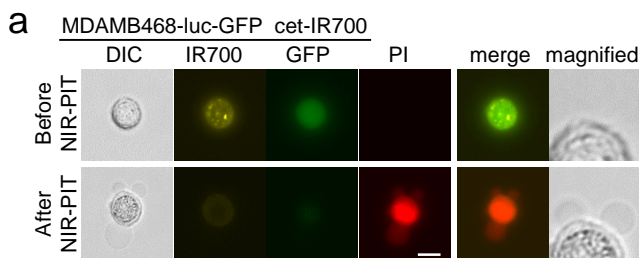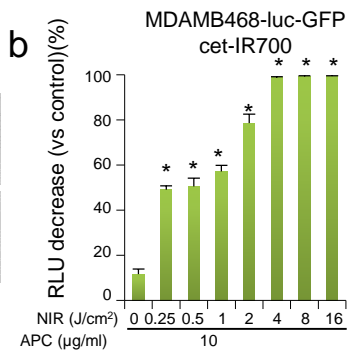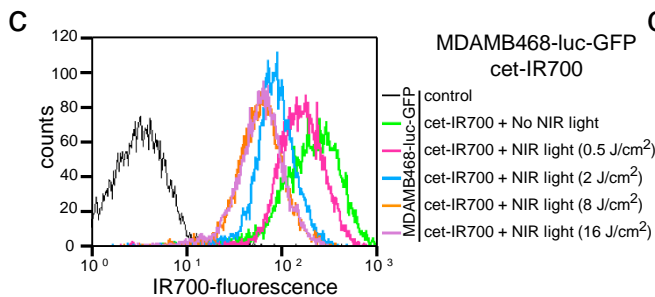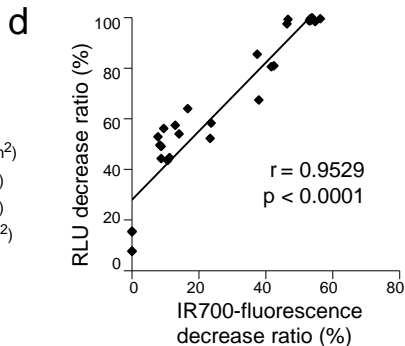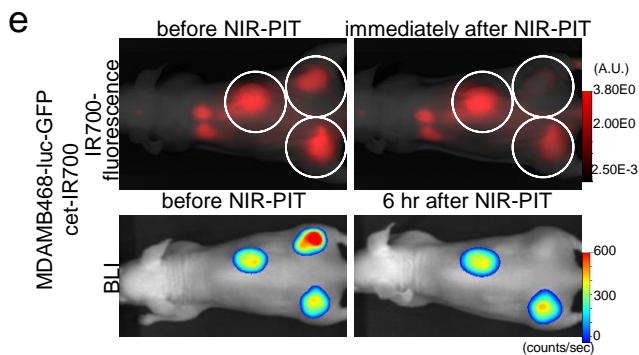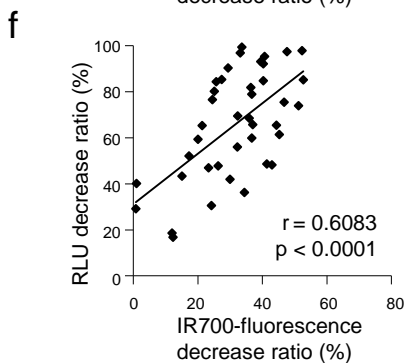

**Figure. S9. Correlation between loss of IR700-fluorescence and antitumor effect in vitro and in vivo (MDAMB468-luc-GFP with cet-IR700)**

(a) MDAMB468-luc-GFP cells were incubated with cet-IR700 for 6 hr, and observed with a microscope before and after irradiation of NIR-light ( $2 \text{ J/cm}^2$ ). Necrotic cell death with loss of IR700-fluorescence was observed after exposure to NIR-light (1 hr after NIR-PIT). Bar =  $50 \mu\text{m}$ . (b) Luciferase activity in MDAMB468-luc-GFP cells was measured as percentage decrease of relative light units (RLU) vs untreated cells, which decreased in a NIR-light dose-dependent manner. ( $n = 4$ ,  $*p < 0.0001$ ,  $**p < 0.001$ ,  $***p < 0.01$ , vs. untreated control, Student's t test) (c) IR700-fluorescence on the cell treated with NIR-PIT, was evaluated with a flow cytometry and decreased in a NIR-light dose-dependent manner. (d) Positive correlation was detected between RLU decrease ratio and IR700-fluorescence decrease ratio ( $n = 30$ ,  $r = 0.9529$ ,  $p < 0.0001$ , Pearson's product moment correlation coefficient). (e) *In vivo* BLI and IR700-fluorescence imaging of subcutaneous tumor model before and at 6 hr after the NIR-light irradiation. (f) Positive correlation was detected between RLU decrease ratio and IR700-fluorescence decrease ratio ( $n = 40$ ,  $r = 0.6083$ ,  $p < 0.0001$ , Pearson's product moment correlation coefficient).

# Supplementary Figure 10

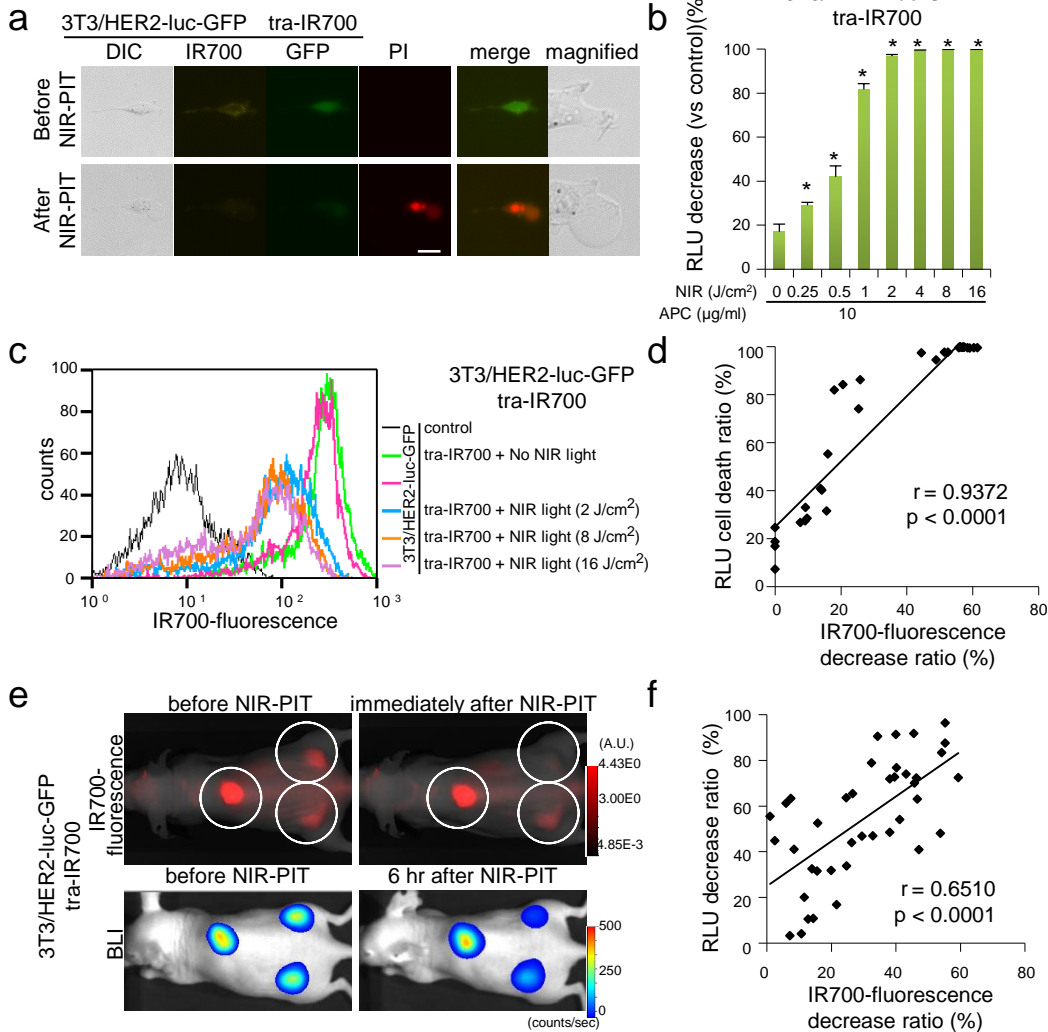



**Figure. S10. Correlation between loss of IR700-fluorescence and antitumor effect in vitro and in vivo (3T3/Her2-luc-GFP with tra-IR700)**

(a) 3T3/Her2-luc-GFP cells were incubated with tra-IR700 for 6 hr, and observed with a microscope before and after irradiation of NIR-light ( $2 \text{ J/cm}^2$ ). Necrotic cell death with loss of IR700-fluorescence was observed after exposure to NIR-light (1 hr after NIR-PIT). Bar =  $50 \mu\text{m}$ . (b) Luciferase activity in 3T3/Her2-luc-GFP cells was measured as percentage decrease of relative light units (RLU) vs untreated cells, which decreased in a NIR-light dose-dependent manner. ( $n = 4$ ,  $*p < 0.0001$ ,  $**p < 0.001$ ,  $***p < 0.01$ , vs. untreated control, Student's t test) (c) IR700-fluorescence on the cell treated with NIR-PIT, was evaluated with a flow cytometry and decreased in a NIR-light dose-dependent manner. (d) Positive correlation was detected between RLU decrease ratio and IR700-fluorescence decrease ratio ( $n = 30$ ,  $r = 0.9372$ ,  $p < 0.0001$ , Pearson's product moment correlation coefficient). (e) *In vivo* BLI and IR700-fluorescence imaging of subcutaneous tumor model before and at 6 hr after the NIR-light irradiation. (f) Positive correlation was detected between RLU decrease ratio and IR700-fluorescence decrease ratio ( $n = 40$ ,  $r = 0.6510$ ,  $p < 0.0001$ , Pearson's product moment correlation coefficient).

# Supplementary Figure 11

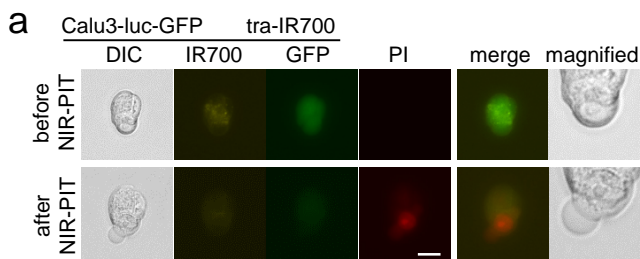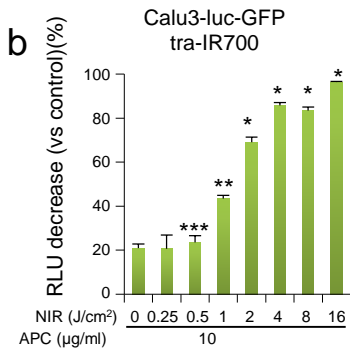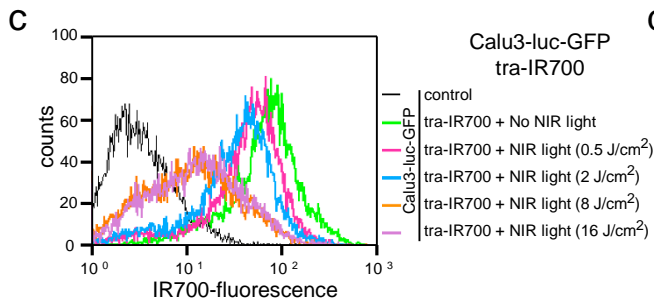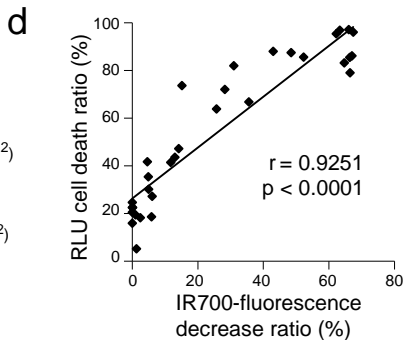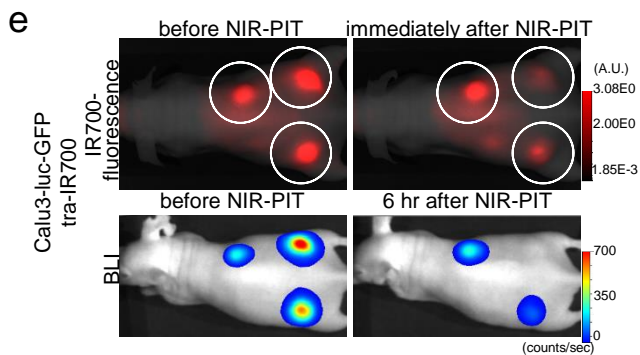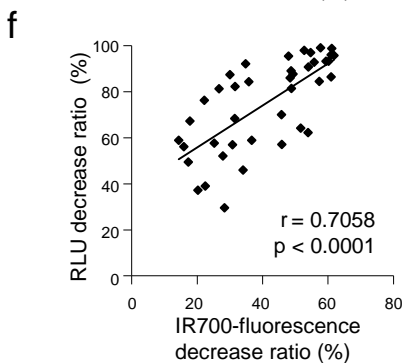

**Figure. S11. Correlation between loss of IR700-fluorescence and antitumor effect in vitro and in vivo (Calu3-luc-GFP with tra-IR700)**

(a) Calu3-luc-GFP cells were incubated with tra-IR700 for 6 hr, and observed with a microscope before and after irradiation of NIR-light ( $2 \text{ J/cm}^2$ ). Necrotic cell death with loss of IR700-fluorescence was observed after exposure to NIR-light (1 hr after NIR-PIT). Bar =  $50 \mu\text{m}$ . (b) Luciferase activity in Calu3-luc-GFP cells was measured as percentage decrease of relative light units (RLU) vs untreated cells, which decreased in a NIR-light dose-dependent manner. ( $n = 4$ ,  $*p < 0.0001$ ,  $**p < 0.001$ ,  $***p < 0.01$ , vs. untreated control, Student's t test) (c) IR700-fluorescence of the cell treated with NIR-PIT, was evaluated with a flow cytometry and decreased in a NIR-light dose-dependent manner. (d) Positive correlation was detected between RLU decrease ratio and IR700-fluorescence decrease ratio ( $n = 30$ ,  $r = 0.9251$ ,  $p < 0.0001$ , Pearson's product moment correlation coefficient). (e) *In vivo* BLI and IR700-fluorescence imaging of subcutaneous tumor model before and at 6 hr after the NIR-light irradiation. (f) Positive correlation was detected between RLU decrease ratio and IR700-fluorescence decrease ratio ( $n = 40$ ,  $r = 0.7058$ ,  $p < 0.0001$ , Pearson's product moment correlation coefficient).







# Supplementary Figure 15

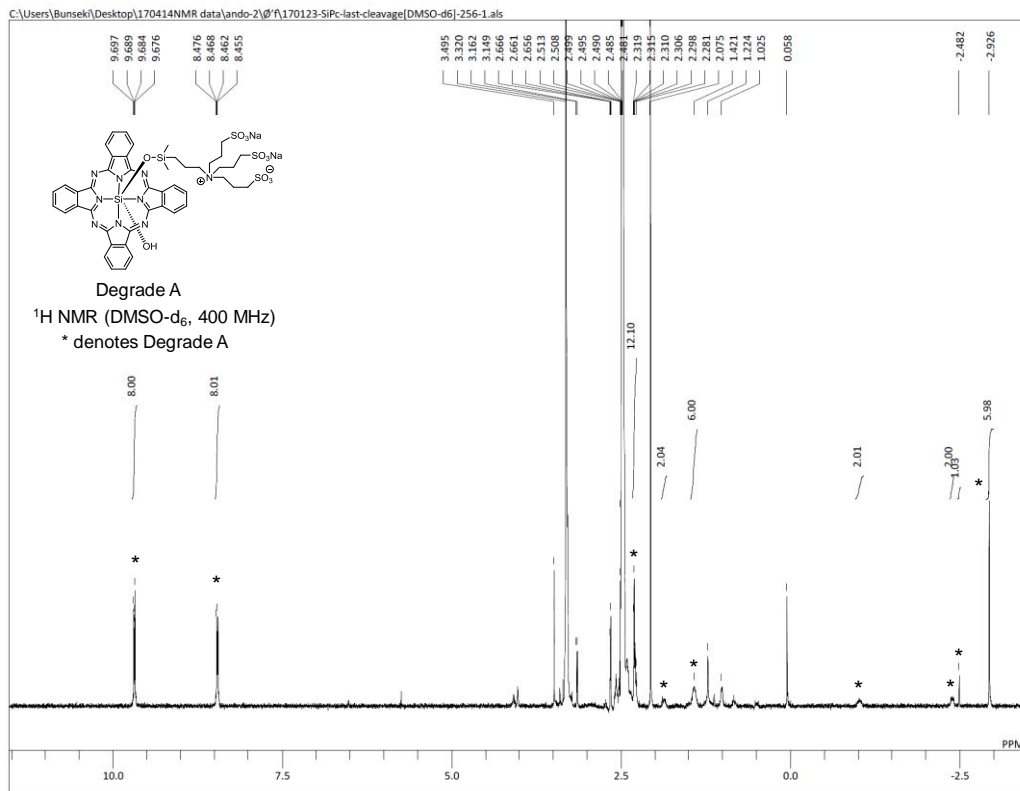

Figure. S15.  $^1\text{H}$  NMR spectrum of Degrade A in DMSO- $d_6$

### **Supplementary video1. 2 .3**

Quantitative phase microscope (QPM) and dual-angle selective plane illumination microscope (diSPIM) showd morphological changes of NIR-PIT treated cells.
